# Supplementary material for: Retention of OsNMD3 in the cytoplasm disturbs protein synthesis efficiency and affects plant development in rice
Source: PubMed Central journal article supplement (PMC4071826; doi:10.1093/jxb/eru150), 2014-04-10
Supplement: supp_eru150_Supplementary_data.pdf [file supp_eru150_Supplementary_data.pdf]

**A**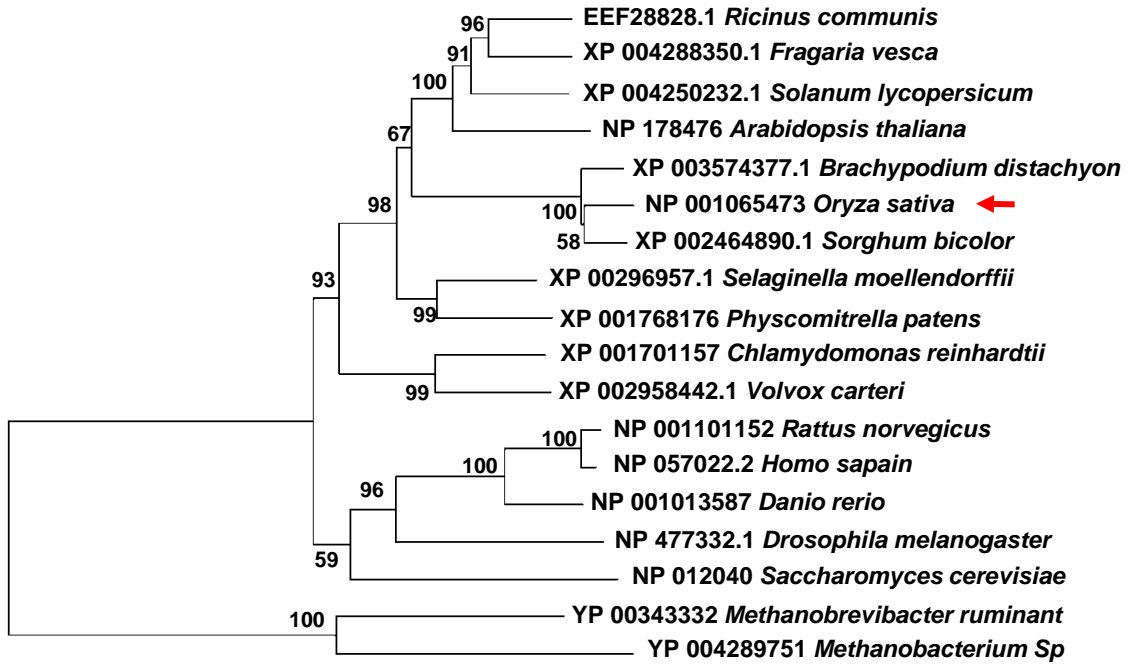**B**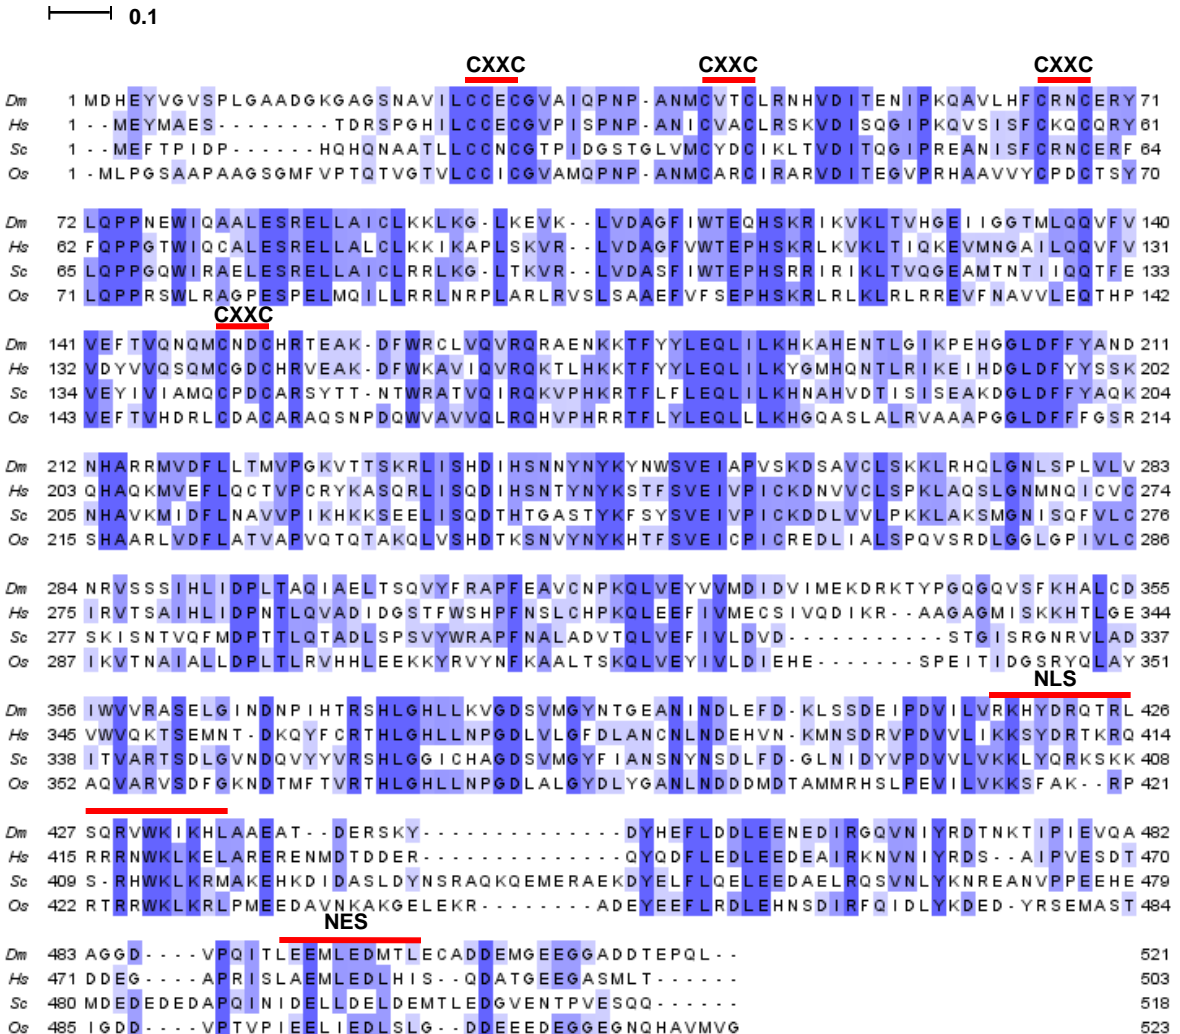

**Supplementary Fig. S1.** Bioinformatics analysis of NMD3 sequences from different species. **(A)** Neighbor-joining tree of rice NMD3 and its homologs from different species. The name of species is shown at the right. The numbers at each node represent the bootstrap support (percentage). The scale bar indicates genetic distance based on branch length. The red arrow indicates OsNMD3. **(B)** Alignment of OsNMD3 with its homologs. The conserved residues were shown in blue, and the conservation depends on darkness of the color. Red bars indicate the conserved Cx<sub>2</sub>C repeats, a NLS, and a leucine-rich NES motifs. Numbers before the sequence indicate sites of the proteins. The accession numbers of proteins are shown as following: *Sc*, *S. cerevisiae* (GenBank 012040); *Dm*, *D. melanogaster* (GenBank 2661560); *Hs*, *H. sapien* (GenBank 057022); *Os*, *O. Sativa* (GenBank 001065473). Alignments were performed by using CLUSTALX.

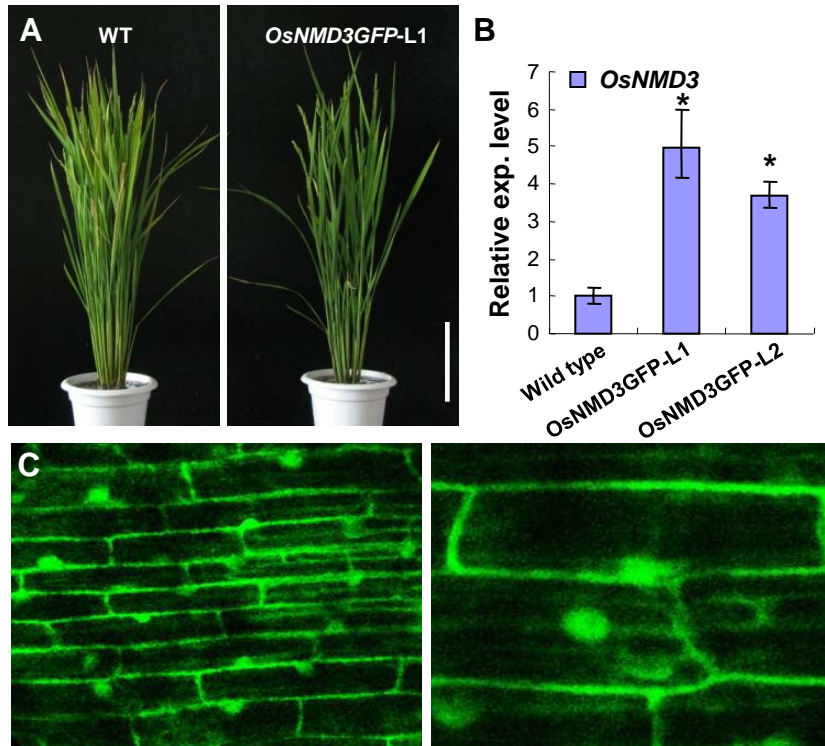

**Supplementary Fig. S2.** Expression of *OsNMD3GFP* in rice plants. **(A)** Two-month-old wild-type plants and plants expressing *OsNMD3GFP*. **(B)** Relative expression level of *OsNMD3* in wild-type and two transgenic lines; data are mean  $\pm$  SE ( $n = 3$ ,  $*P < 0.01$  by Student's *t*-test). **(C)** *OsNMD3GFP* signals in the root cells of the relevant transgenic plants. Bars, 20 cm in **(A)** and 10  $\mu$ m in **(C)**.

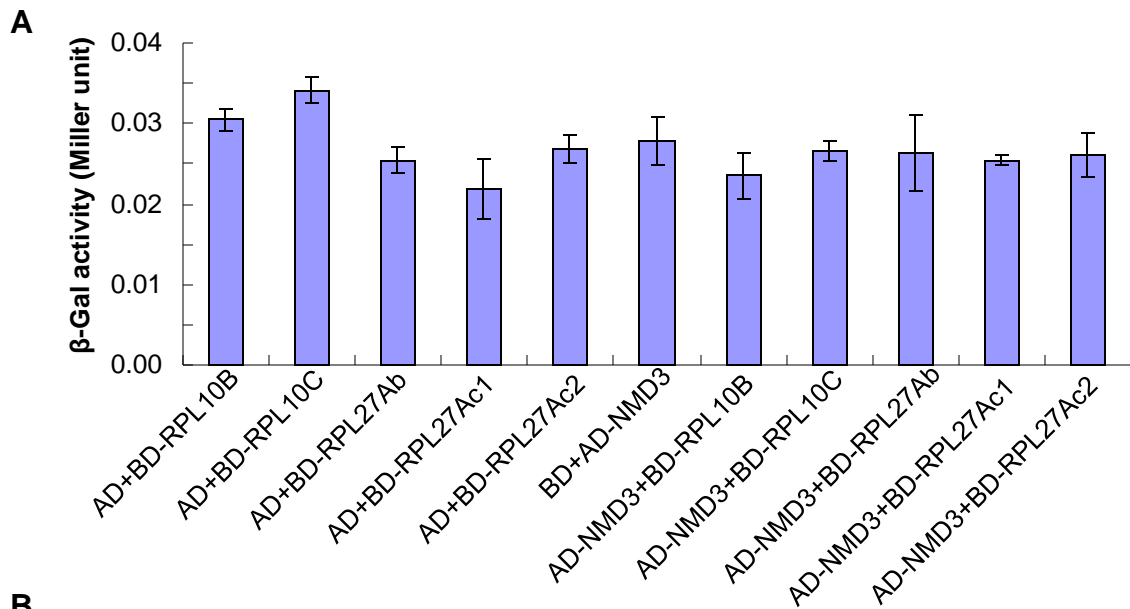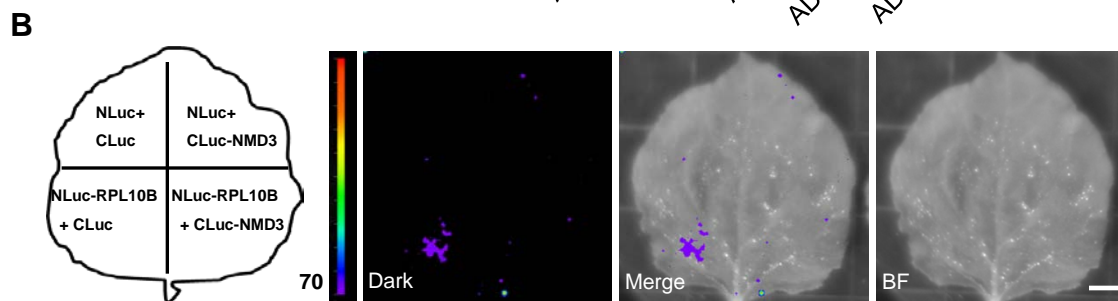

**Supplementary Fig. S3.** Interaction of *OsNMD3* with the indicated RPLs. **(A)**  $\beta$ -galactosidase activity assay in yeast cells expressing *OsNMD3* and indicated RPLs. **(B)** Firefly luciferase complementation image showing the interaction of *OsNMD3* with one representative RPL10 protein (RPL10B). Bars, 1 cm.

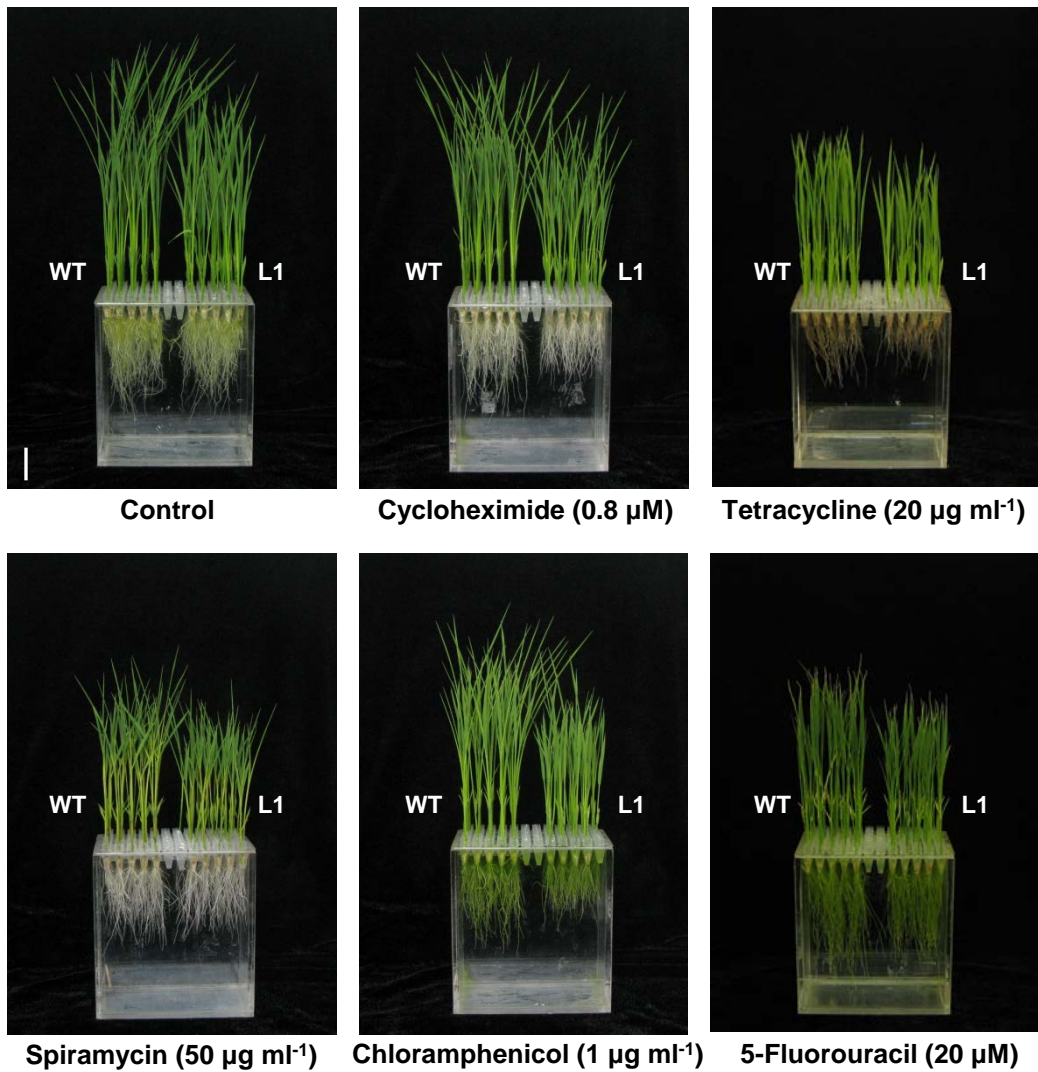

**Supplementary Fig. S4.** Growth status of wild-type and *OsNMD3*<sup>ΔNLS</sup>*GFP* transgenic plants treated with antibiotics and chemicals.

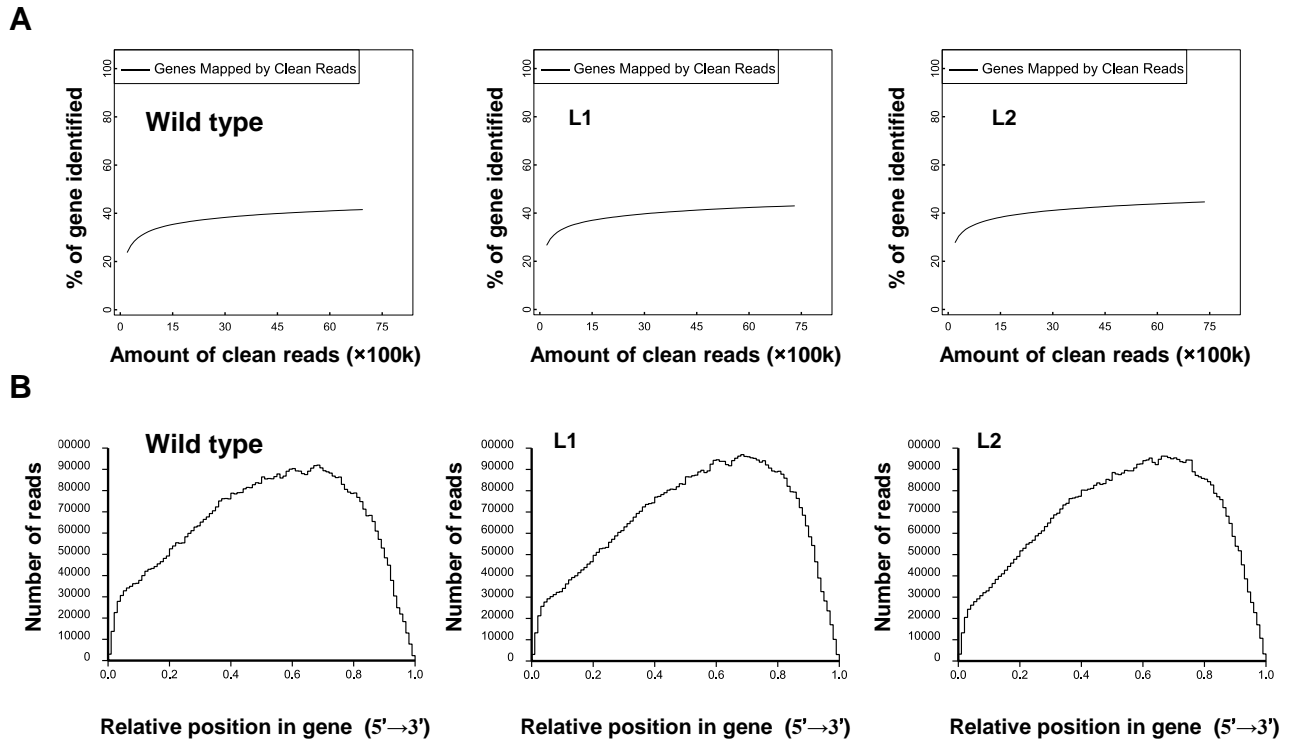

**Supplementary Fig. S5.** Quality of RNAseq data of wild-type and two transgenic lines expressing *OsNMD3<sup>ΔNLS</sup>GFP*. **(A)** Saturation analysis of the identified genes showed that the detected genes are saturated. **(B)** Random distribution of the reads in the reference genes.

## Supplementary Tables

**Supplementary Table S1.** PCR primers.

| Purpose                             | Orientation | Primer Sequence                                           |
|-------------------------------------|-------------|-----------------------------------------------------------|
| Clone of <i>NMD3</i>                | Forward     | GGGGACAAGTTTGTACAAAAAAGCAGGCTCAATGCTGCCGGGTCG             |
|                                     | Reverse 1   | GGGGACCACTTTGTACAAGAAAGCTGGGTATCCCACCATAACAGCATGTTG       |
|                                     | Reverse 2   | GGGGACCACTTTGTACAAGAAAGCTGGGTATCATCCCACCATAACAGCATG       |
| Clone of <i>NMD3<sup>ANES</sup></i> | Forward     | CTCCTCATCATCACCCGGCACAGTGGGAACATCATCACC                   |
|                                     | Reverse     | GTTCCCACTGTGCCGGGTGATGATGAGGAGGAGGATGAAG                  |
| Clone of <i>NMD3<sup>ANLS</sup></i> | Forward     | GAAGTCATTCTTGTCTACCAATGGAGGAAGATGCTGTAAAT                 |
|                                     | Reverse     | TTCTCCATTGGAAGAACAAGAATGACTTCAGGCAGACTG                   |
| Antibody of <i>NMD3</i>             | Forward     | TAGAATTCAAGAAGAGCTTCGCCAAGAG                              |
|                                     | Reverse     | TCTCGAGATGTTGGTTGCCTTCCCCAC                               |
| Clone of <i>RPL10Ac1</i>            | Forward     | GGGGACAAGTTTGTACAAAAAAGCAGGCTCAATGAGTAAGTTGCAGAGCGA       |
|                                     | Reverse 1   | GGGGACCACTTTGTACAAGAAAGCTGGGTATTAGAACACCCTGATTGGTT        |
|                                     | Reverse 2   | GGGGACCACTTTGTACAAGAAAGCTGGGTAGAACACCCTGATTGGTTTCC        |
| Clone of <i>RPL10B</i>              | Forward     | GGGGACAAGTTTGTACAAAAAAGCAGGCTCAATGGGGAGGAGACCTGCAAG       |
|                                     | Reverse 1   | GGGGACCACTTTGTACAAGAAAGCTGGGTACTAAGCGGCTGAGAGGAAGG        |
|                                     | Reverse 2   | GGGGACCACTTTGTACAAGAAAGCTGGGTAAAGCGGCTGAGAGGAAGG          |
| Clone of <i>RPL10C</i>              | Forward     | GGGGACAAGTTTGTACAAAAAAGCAGGCTCAATGGGGAGAAGGCCTGCTAG       |
|                                     | Reverse 1   | GGGGACCACTTTGTACAAGAAAGCTGGGTACTAGGCGGAAGCTTGAATGG        |
|                                     | Reverse 2   | GGGGACCACTTTGTACAAGAAAGCTGGGTAGGCGGAAGCTTGAATGG           |
| Clone of <i>RPL27Ab</i>             | Forward     | GGGGACAAGTTTGTACAAAAAAGCAGGCTCAATGACGACGAGCCTGAGGAA       |
|                                     | Reverse 1   | GGGGACCACTTTGTACAAGAAAGCTGGGTaCTAGGCGGTGAGCACGACGG        |
|                                     | Reverse 2   | GGGGACCACTTTGTACAAGAAAGCTGGGTAGGCGGTGAGCACGACGG           |
| Clone of <i>RPL27Ac1</i>            | Forward     | GGGGACAAGTTTGTACAAAAAAGCAGGCTCAATGACAACGCGCTTCAAGAAG<br>A |
|                                     | Reverse 1   | GGGGACCACTTTGTACAAGAAAGCTGGGTACTAGGCGGTGAGGAGGACGG        |

---

|                                     |                                                            |
|-------------------------------------|------------------------------------------------------------|
| Reverse 2                           | GGGGACCACTTTGTACAAGAAAGCTGGGTAGGCGGTGAGGAGGACGG            |
| Clone of Forward<br><i>RPL27Ac2</i> | GGGGACAAGTTTGTACAAAAAAGCAGGCTcaATGACGACGAGGTCAAGAAG<br>AAC |

---



**Supplementary Table S2.** qRT-PCR primers.

| Genes        | Forward primer sequence  | Reverse primer sequence |
|--------------|--------------------------|-------------------------|
| <i>UBQ5</i>  | ACCACTTCGACCGCCACTACT    | ACGCCTAAGCCTGCTGGTT     |
| <i>NMD3</i>  | AGCACAACTCTGATATTAG      | GGAACATCATCACCAATA      |
| <i>IPA1</i>  | TAAGGTGACTGGCGATTA       | ACAGCATTAACTGATACTT     |
| <i>DEP1</i>  | GTAACCCATGCTGTCTCA       | TTCAACCTCGTCTCATAGC     |
| <i>CIN1</i>  | TTGCTGAGGATGATTGGA       | AACAACCTCGTGATACAACAA   |
| <i>GID2</i>  | CAGTTGTGAGCCTTATCT       | TGAATCAAGAACCATCGT      |
| <i>BRD2</i>  | TTGTAATCCTGTTCATCGT      | AAGTTCACCTCATCTGAT      |
| <i>BZR1</i>  | TAGCCTTAGGTTAATCTTGTTG   | ACAGTGAAGCCGTGAATA      |
| <i>DSG1</i>  | TGTCTGAACATCTGAATT       | GCTGTATAGTGGTAGTATC     |
| <i>GW8</i>   | AGGAGTTTGATGAGGCCAAG     | GCGTGTAGTATGGGCTCTCC    |
| <i>Ghd7</i>  | AGGTGCTACGAGAAGCAAATCC   | GGCCTCATCTCGGCATAG      |
| <i>CESA4</i> | CTCCGAGACCACCACCAAC      | ACCCATCGTCTTCGTCGCATTAG |
| <i>CESA7</i> | AAGCCATGCGGGGTCTCGTG     | CATCCATCCGGTCATCCCTCTTG |
| <i>CESA9</i> | ATCGCGCTCTTCATCTCCATCTTC | ACTGCTCGTTCCTCCACCACTCC |
| <i>BC1</i>   | CTTTGAAATTGCCTGATAGA     | AAAGTTTGTGGTGTGATTT     |
| <i>MYB61</i> | ATATCTTGAGCCACTTGT       | ATCCTCTTGGTGATTCAG      |
| <i>NAC73</i> | CAGGGCAGGTATATGATG       | CACTCCTTATTGTCCAGTAA    |
| <i>NAC62</i> | TCTTAACCTTACATTCATCCATCA | GCATCATCAGGACCTCTTC     |
| <i>MYB58</i> | GTAGTAGAGACACAACAC       | ATATAGCACTTCTCATTGG     |

**Supplementary Table S3.** Alterations in expression of genes encoding the ribosomal proteins according to RNAseq data for wild-type and transgenic plants.

| Name                | Gene ID        | Gene length | Wild Type | L1     | L2     | log2 Ratio (L1/WT) | FDR       | log2 Ratio (L2/WT) | FDR       |
|---------------------|----------------|-------------|-----------|--------|--------|--------------------|-----------|--------------------|-----------|
| <i>RPL3A</i>        | LOC_Os11g06750 | 1607        | 382.19    | 287.04 | 438.28 | -0.41              | 6.85E-30  | 0.20               | 2.82E-09  |
| <i>RPL3B</i>        | LOC_Os12g07010 | 1489        | 746.16    | 315.46 | 454.42 | -1.24              | 0.00E+00  | -0.72              | 2.21E-143 |
| <i>RPL4</i>         | LOC_Os07g08330 | 1723        | 195.23    | 145.93 | 288.79 | -0.42              | 3.71E-17  | 0.56               | 0.00E+00  |
| <i>RPL6C</i>        | LOC_Os04g39700 | 974         | 185.03    | 118.44 | 188.25 | -0.64              | 6.94E-20  | 0.02               | 7.27E-01  |
| <i>RPL7B</i>        | LOC_Os08g13690 | 1269        | 1112.48   | 402.55 | 604.43 | -1.47              | 0.00E+00  | -0.88              | 1.09E-259 |
| <i>RPL7D</i>        | LOC_Os04g51630 | 1674        | 103.20    | 123.36 | 182.08 | 0.26               | 5.67E-05  | 0.82               | 1.49E-11  |
| <i>RPL7Aa</i>       | LOC_Os08g23710 | 1205        | 603.89    | 259.43 | 432.99 | -1.22              | 5.05E-229 | -0.48              | 1.84E-46  |
| <i>RPL8A</i>        | LOC_Os12g38000 | 1130        | 624.15    | 300.91 | 462.72 | -1.05              | 1.90E-175 | -0.43              | 3.12E-37  |
| <i>RPL90A/C</i>     | LOC_Os09g31180 | 1490        | 384.36    | 172.28 | 290.04 | -1.16              | 2.83E-166 | -0.41              | 3.06E-27  |
| <i>RPL10B</i>       | LOC_Os05g07700 | 1669        | 622.74    | 353.14 | 555.25 | -0.82              | 1.94E-169 | -0.17              | 1.14E-09  |
| <i>RPL10C</i>       | LOC_Os11g11390 | 1059        | 340.52    | 170.02 | 196.41 | -1.00              | 4.07E-83  | -0.79              | 2.48E-56  |
| <i>RPL10Ac</i>      | LOC_Os08g44380 | 1910        | 93.84     | 139.40 | 238.32 | 0.57               | 3.64E-11  | 1.34               | 2.52E-11  |
| <i>RPL10Ac</i>      | LOC_Os08g44450 | 1276        | 201.98    | 143.85 | 194.73 | -0.49              | 1.97E-17  | -0.05              | 3.95E-01  |
| <i>RPL10Ac</i>      | LOC_Os02g21660 | 1478        | 335.49    | 197.50 | 221.59 | -0.76              | 2.80E-72  | -0.60              | 3.20E-47  |
| <i>RPL11B</i>       | LOC_Os05g11710 | 1029        | 320.45    | 186.90 | 199.65 | -0.78              | 9.56E-50  | -0.68              | 7.68E-40  |
| <i>RPL11B</i>       | LOC_Os01g10820 | 549         | 462.79    | 174.43 | 171.07 | -1.41              | 2.21E-100 | -1.44              | 2.57E-103 |
| <i>RPL12A</i>       | LOC_Os02g47140 | 984         | 375.24    | 161.12 | 174.96 | -1.22              | 1.04E-116 | -1.10              | 4.45E-99  |
| <i>RPL12B</i>       | LOC_Os04g50990 | 898         | 459.60    | 180.10 | 192.60 | -1.35              | 7.30E-153 | -1.25              | 4.14E-136 |
| <i>RPL13D</i>       | LOC_Os06g02510 | 1284        | 274.00    | 162.44 | 197.88 | -0.75              | 2.62E-50  | -0.47              | 4.82E-22  |
| <i>11669.m03747</i> | LOC_Os03g37970 | 1150        | 738.98    | 303.02 | 501.70 | -1.29              | 9.26E-291 | -0.56              | 4.53E-71  |
| <i>RPL13Ad</i>      | LOC_Os03g54890 | 1164        | 414.59    | 214.78 | 262.13 | -0.95              | 2.03E-101 | -0.66              | 8.43E-55  |
| <i>RPL13Ab</i>      | LOC_Os07g01870 | 1298        | 137.06    | 92.80  | 120.92 | -0.56              | 1.47E-15  | -0.18              | 8.24E-03  |
| <i>RPL14A</i>       | LOC_Os02g40880 | 926         | 541.40    | 291.83 | 372.69 | -0.89              | 6.36E-95  | -0.54              | 1.20E-39  |
| <i>RPL15A</i>       | LOC_Os03g40180 | 1145        | 366.83    | 196.21 | 222.32 | -0.90              | 2.59E-81  | -0.72              | 1.05E-55  |
| <i>RPL15A</i>       | LOC_Os05g19370 | 1156        | 153.89    | 81.87  | 83.74  | -0.91              | 2.58E-35  | -0.88              | 2.20E-33  |
| <i>RPL17A</i>       | LOC_Os09g08430 | 950         | 399.85    | 409.91 | 786.85 | 0.04               | 5.31E-01  | 0.98               | 0.00E+00  |
| <i>RPL17B</i>       | LOC_Os08g41810 | 552         | 447.04    | 265.85 | 321.73 | -0.75              | 4.01E-35  | -0.47              | 5.28E-16  |
| <i>RPL18C</i>       | LOC_Os07g47780 | 901         | 58.75     | 43.50  | 61.80  | -0.43              | 1.02E-03  | 0.07               | 6.02E-01  |
| <i>RPL18A</i>       | LOC_Os07g47780 | 901         | 58.75     | 43.50  | 61.80  | -0.43              | 1.02E-03  | 0.07               | 6.02E-01  |
| <i>RPL18B</i>       | LOC_Os05g06310 | 1008        | 453.40    | 272.36 | 322.38 | -0.74              | 2.38E-62  | -0.49              | 7.66E-31  |
| <i>RPL18C</i>       | LOC_Os03g22180 | 892         | 271.44    | 167.37 | 218.47 | -0.70              | 1.88E-30  | -0.31              | 6.71E-08  |
| <i>RPL18Ab</i>      | LOC_Os01g54870 | 933         | 291.88    | 248.65 | 352.58 | -0.23              | 2.84E-05  | 0.27               | 3.47E-08  |
| <i>RPL18Ac</i>      | LOC_Os01g47660 | 897         | 390.73    | 215.47 | 298.23 | -0.86              | 1.69E-62  | -0.39              | 8.45E-16  |
| <i>RPL19A</i>       | LOC_Os03g21940 | 1123        | 333.23    | 304.20 | 418.44 | -0.13              | 6.02E-03  | 0.33               | 0.00E+00  |
| <i>RPL19B</i>       | LOC_Os03g38260 | 939         | 145.63    | 174.78 | 203.28 | 0.26               | 2.70E-04  | 0.48               | 3.19E-12  |
| <i>RPL21A</i>       | LOC_Os10g32820 | 495         | 790.53    | 380.80 | 449.61 | -1.05              | 7.32E-98  | -0.81              | 1.01E-63  |
| <i>RPL21E</i>       | LOC_Os03g04750 | 944         | 598.05    | 232.59 | 227.62 | -1.36              | 2.17E-211 | -1.39              | 2.05E-218 |
| <i>RPL22B</i>       | LOC_Os07g47710 | 950         | 310.06    | 136.19 | 244.21 | -1.19              | 2.45E-89  | -0.34              | 5.46E-11  |
| <i>RPL22C</i>       | LOC_Os03g22340 | 844         | 437.29    | 188.22 | 149.57 | -1.22              | 4.01E-116 | -1.55              | 2.82E-167 |
| <i>RPL23A</i>       | LOC_Os03g04590 | 1093        | 151.53    | 107.44 | 144.19 | -0.50              | 7.37E-12  | -0.07              | 3.47E-01  |

|                |                |      |         |        |        |       |           |       |           |
|----------------|----------------|------|---------|--------|--------|-------|-----------|-------|-----------|
| <i>RPL23B</i>  | LOC_Os10g32920 | 650  | 699.80  | 298.33 | 351.99 | -1.23 | 1.62E-145 | -0.99 | 9.25E-103 |
| <i>RPL23C</i>  | LOC_Os02g56960 | 782  | 409.36  | 467.01 | 442.35 | 0.19  | 6.36E-05  | 0.11  | 2.26E-02  |
| <i>RPL23Aa</i> | LOC_Os04g42270 | 996  | 691.29  | 518.64 | 859.10 | -0.41 | 1.17E-33  | 0.31  | 8.80E-11  |
| <i>RPL23Ab</i> | LOC_Os01g24690 | 923  | 392.31  | 344.05 | 713.31 | -0.19 | 7.24E-05  | 0.86  | 0.00E+00  |
| <i>RPL24A</i>  | LOC_Os01g59990 | 1018 | 507.14  | 343.87 | 425.93 | -0.56 | 1.13E-43  | -0.25 | 1.16E-10  |
| <i>RPL24A</i>  | LOC_Os05g40820 | 990  | 162.26  | 255.26 | 346.66 | 0.65  | 0.00E+00  | 1.10  | 0.00E+00  |
| <i>RPL24A</i>  | LOC_Os07g12250 | 815  | 73.30   | 147.41 | 194.16 | 1.01  | 2.09E-12  | 1.41  | 1.14E-12  |
| <i>RPL24B</i>  | LOC_Os01g33050 | 1023 | 30.66   | 67.13  | 202.07 | 1.13  | 1.41E-12  | 2.72  | 1.27E-12  |
| <i>RPL24B</i>  | LOC_Os07g19190 | 1193 | 13.63   | 28.18  | 79.13  | 1.05  | 4.40E-09  | 2.54  | 0.00E+00  |
| <i>RPL26A</i>  | LOC_Os12g05430 | 823  | 239.95  | 120.23 | 133.56 | -1.00 | 1.94E-45  | -0.85 | 1.06E-34  |
| <i>RPL26A</i>  | LOC_Os11g05370 | 998  | 100.10  | 47.90  | 47.29  | -1.06 | 7.76E-26  | -1.08 | 1.07E-26  |
| <i>RPL26B</i>  | LOC_Os01g04730 | 705  | 332.61  | 149.62 | 142.30 | -1.15 | 5.15E-68  | -1.22 | 7.17E-75  |
| <i>RPL27B</i>  | LOC_Os02g18380 | 767  | 399.41  | 253.24 | 276.40 | -0.66 | 1.30E-34  | -0.53 | 5.80E-24  |
| <i>RPL27C</i>  | LOC_Os10g41470 | 974  | 226.78  | 117.29 | 116.63 | -0.95 | 5.70E-47  | -0.96 | 1.00E-47  |
| <i>RPL27Ab</i> | LOC_Os07g42170 | 802  | 208.99  | 104.50 | 116.91 | -1.00 | 7.59E-39  | -0.84 | 3.63E-29  |
| <i>RPL27Ac</i> | LOC_Os03g29460 | 791  | 479.60  | 233.26 | 304.22 | -1.04 | 7.28E-93  | -0.66 | 9.80E-43  |
| <i>RPL27Ac</i> | LOC_Os02g07890 | 770  | 371.99  | 139.06 | 186.59 | -1.42 | 1.63E-114 | -1.00 | 1.81E-65  |
| <i>RPL29A</i>  | LOC_Os05g28750 | 183  | 283.84  | 394.42 | 413.54 | 0.47  | 2.27E-05  | 0.54  | 5.57E-07  |
| <i>RPL29B</i>  | LOC_Os01g19840 | 551  | 199.38  | 151.24 | 178.58 | -0.40 | 7.85E-06  | -0.16 | 7.66E-02  |
| <i>RPL30A</i>  | LOC_Os01g16890 | 1193 | 607.74  | 194.46 | 219.54 | -1.64 | 0.00E+00  | -1.47 | 2.35E-303 |
| <i>RPL30B</i>  | LOC_Os05g41110 | 822  | 469.18  | 244.43 | 344.52 | -0.94 | 4.83E-80  | -0.45 | 6.07E-22  |
| <i>RPL31A</i>  | LOC_Os02g48660 | 734  | 1074.83 | 435.90 | 492.63 | -1.30 | 3.50E-275 | -1.13 | 2.79E-218 |
| <i>RPL31B</i>  | LOC_Os06g21480 | 816  | 90.30   | 51.75  | 57.45  | -0.80 | 2.29E-12  | -0.65 | 4.46E-09  |
| <i>RPL31C</i>  | LOC_Os08g39500 | 722  | 44.82   | 38.40  | 76.90  | -0.22 | 2.24E-01  | 0.78  | 2.92E-09  |
| <i>RPL32A</i>  | LOC_Os08g41300 | 723  | 881.85  | 538.84 | 576.92 | -0.71 | 9.73E-82  | -0.61 | 6.02E-63  |
| <i>RPL32B</i>  | LOC_Os09g32520 | 752  | 78.34   | 66.53  | 55.96  | -0.24 | 6.72E-02  | -0.49 | 7.53E-05  |
| <i>RPL34A</i>  | LOC_Os09g24690 | 706  | 341.54  | 235.85 | 220.73 | -0.53 | 4.62E-19  | -0.63 | 1.43E-25  |
| <i>RPL34B</i>  | LOC_Os08g33920 | 757  | 293.76  | 216.59 | 219.18 | -0.44 | 1.24E-12  | -0.42 | 5.07E-12  |
| <i>RPL34C</i>  | LOC_Os08g06040 | 693  | 210.25  | 229.23 | 284.21 | 0.12  | 1.12E-01  | 0.43  | 3.07E-11  |
| <i>RPL35B</i>  | LOC_Os02g30050 | 660  | 696.24  | 341.61 | 670.05 | -1.03 | 4.14E-110 | -0.06 | 2.16E-01  |
| <i>RPL35Ab</i> | LOC_Os05g48220 | 824  | 122.25  | 66.91  | 69.71  | -0.87 | 8.51E-19  | -0.81 | 6.56E-17  |
| <i>RPL35Ac</i> | LOC_Os05g48220 | 824  | 122.25  | 66.91  | 69.71  | -0.87 | 8.51E-19  | -0.81 | 6.56E-17  |
| <i>RPL36A</i>  | LOC_Os05g38520 | 784  | 1575.04 | 647.31 | 792.44 | -1.28 | 0.00E+00  | -0.99 | 3.81E-277 |
| <i>RPL36C</i>  | LOC_Os01g62350 | 620  | 46.04   | 96.63  | 134.97 | 1.07  | 2.48E-13  | 1.55  | 3.78E-13  |
| <i>RPL36Aa</i> | LOC_Os07g26740 | 318  | 300.07  | 99.21  | 166.54 | -1.60 | 8.34E-46  | -0.85 | 2.44E-17  |
| <i>RPL37A</i>  | LOC_Os08g03450 | 534  | 423.27  | 177.54 | 258.87 | -1.25 | 7.88E-75  | -0.71 | 1.90E-29  |
| <i>RPL37B</i>  | LOC_Os02g56990 | 822  | 288.09  | 111.26 | 119.51 | -1.37 | 4.25E-90  | -1.27 | 6.58E-80  |
| <i>RPL37C</i>  | LOC_Os02g02130 | 285  | 241.65  | 110.70 | 125.75 | -1.13 | 1.08E-19  | -0.94 | 5.00E-15  |
| <i>RPL37Ab</i> | LOC_Os01g48770 | 853  | 522.95  | 254.98 | 314.37 | -1.04 | 1.86E-108 | -0.73 | 9.01E-61  |
| <i>RPL37Ac</i> | LOC_Os05g48320 | 682  | 442.86  | 180.36 | 190.03 | -1.30 | 4.68E-105 | -1.22 | 1.18E-95  |
| <i>RPL38A</i>  | LOC_Os07g36250 | 1790 | 5.38    | 6.41   | 7.69   | 0.25  | 4.48E-01  | 0.52  | 5.56E-02  |
| <i>RPL38A</i>  | LOC_Os11g24610 | 1058 | 410.01  | 231.47 | 299.88 | -0.82 | 4.22E-72  | -0.45 | 3.85E-25  |
| <i>RPL39A</i>  | LOC_Os06g08320 | 154  | 542.03  | 488.36 | 576.61 | -0.15 | 1.76E-01  | 0.09  | 4.01E-01  |
| <i>RPL39B</i>  | LOC_Os02g55370 | 433  | 273.26  | 137.99 | 160.00 | -0.99 | 5.64E-27  | -0.77 | 3.29E-18  |

|                     |                |      |         |        |         |       |           |       |           |
|---------------------|----------------|------|---------|--------|---------|-------|-----------|-------|-----------|
| <i>RPL40A</i>       | LOC_Os09g39500 | 780  | 401.90  | 244.93 | 213.74  | -0.71 | 6.70E-41  | -0.91 | 7.67E-62  |
| <i>RPL40A</i>       | LOC_Os03g15370 | 1113 | 0.60    | 0.14   | 91.57   | -2.06 | 3.11E-01  | 7.26  | 9.91E-05  |
| <i>RPP0A</i>        | LOC_Os12g03880 | 1272 | 74.23   | 49.23  | 63.65   | -0.59 | 1.47E-09  | -0.22 | 2.00E-02  |
| <i>RPP0B</i>        | LOC_Os08g03640 | 1252 | 1033.21 | 622.20 | 1077.17 | -0.73 | 1.19E-173 | 0.06  | 1.40E-02  |
| <i>RPP1B</i>        | LOC_Os08g02340 | 835  | 801.13  | 376.11 | 421.93  | -1.09 | 2.14E-176 | -0.93 | 2.57E-134 |
| <i>RPP0C</i>        | LOC_Os11g04070 | 1121 | 46.48   | 20.75  | 42.25   | -1.16 | 8.12E-16  | -0.14 | 3.18E-01  |
| <i>RPP2A</i>        | LOC_Os05g37330 | 819  | 1119.30 | 462.84 | 436.62  | -1.27 | 0.00E+00  | -1.36 | 0.00E+00  |
| <i>RPP2B</i>        | LOC_Os01g09510 | 886  | 758.95  | 287.02 | 301.03  | -1.40 | 4.72E-263 | -1.33 | 3.37E-243 |
| <i>RPP2D</i>        | LOC_Os02g32760 | 719  | 108.02  | 54.29  | 34.49   | -0.99 | 4.14E-18  | -1.65 | 3.52E-39  |
| <i>RPP2E</i>        | LOC_Os07g14750 | 0    | 0.00    | 0.00   | 0.71    | 0.00  | 0.00E+00  | 9.46  | 3.44E-01  |
| <i>RPSAb</i>        | LOC_Os07g42450 | 1348 | 204.11  | 132.86 | 172.82  | -0.62 | 4.31E-28  | -0.24 | 9.15E-06  |
| <i>RPSAa</i>        | LOC_Os03g08440 | 1445 | 220.85  | 162.31 | 333.17  | -0.44 | 4.96E-18  | 0.59  | 1.30E-11  |
| <i>RPS2A</i>        | LOC_Os07g10660 | 1223 | 69.88   | 51.98  | 68.03   | -0.43 | 2.87E-05  | -0.04 | 7.08E-01  |
| <i>RPS2B</i>        | LOC_Os03g59310 | 1113 | 498.89  | 216.46 | 277.01  | -1.20 | 9.93E-172 | -0.85 | 1.24E-96  |
| <i>RPS3B</i>        | LOC_Os03g38000 | 1286 | 395.52  | 258.83 | 377.47  | -0.61 | 2.97E-50  | -0.07 | 1.04E-01  |
| <i>RPS3A</i>        | LOC_Os07g41750 | 1096 | 111.44  | 72.40  | 76.20   | -0.62 | 5.72E-13  | -0.55 | 8.81E-11  |
| <i>RPS3Aa</i>       | LOC_Os03g10340 | 1914 | 187.19  | 250.66 | 330.03  | 0.42  | 0.00E+00  | 0.82  | 0.00E+00  |
| <i>RPS4A</i>        | LOC_Os02g01560 | 1307 | 1864.81 | 723.90 | 886.78  | -1.37 | 0.00E+00  | -1.07 | 0.00E+00  |
| <i>RPS4B</i>        | LOC_Os01g25610 | 1242 | 599.80  | 230.92 | 366.76  | -1.38 | 3.07E-283 | -0.71 | 4.29E-95  |
| <i>11687.m02656</i> | LOC_Os11g29190 | 1120 | 483.18  | 318.10 | 414.56  | -0.60 | 4.31E-52  | -0.22 | 6.60E-09  |
| <i>11667.m00007</i> | LOC_Os01g01060 | 920  | 248.20  | 155.18 | 233.74  | -0.68 | 2.35E-27  | -0.09 | 1.70E-01  |
| <i>RPS6A</i>        | LOC_Os07g42950 | 753  | 773.55  | 378.77 | 612.15  | -1.03 | 4.94E-140 | -0.34 | 7.82E-20  |
| <i>RPS6B</i>        | LOC_Os03g27260 | 1101 | 578.19  | 331.26 | 566.60  | -0.80 | 7.09E-101 | -0.03 | 4.68E-01  |
| <i>RPS7A</i>        | LOC_Os03g18580 | 579  | 187.73  | 75.68  | 83.45   | -1.31 | 6.87E-39  | -1.17 | 9.56E-33  |
| <i>RPS7B</i>        | LOC_Os03g18570 | 968  | 420.02  | 208.39 | 247.60  | -1.01 | 5.00E-95  | -0.76 | 3.54E-59  |
| <i>RPS7C</i>        | LOC_Os05g27940 | 1132 | 303.75  | 166.52 | 224.17  | -0.87 | 2.34E-62  | -0.44 | 4.28E-19  |
| <i>RPS8A</i>        | LOC_Os04g28180 | 1054 | 1512.13 | 565.84 | 764.62  | -1.42 | 0.00E+00  | -0.98 | 0.00E+00  |
| <i>RPS10C</i>       | LOC_Os01g73160 | 540  | 330.36  | 98.26  | 77.92   | -1.75 | 7.39E-97  | -2.08 | 2.63E-122 |
| <i>11668.m03261</i> | LOC_Os02g34460 | 894  | 87.06   | 31.55  | 35.44   | -1.46 | 4.63E-33  | -1.30 | 1.03E-27  |
| <i>11670.m03387</i> | LOC_Os04g35090 | 552  | 628.63  | 348.69 | 385.50  | -0.85 | 7.37E-61  | -0.71 | 2.53E-44  |
| <i>RPS12C</i>       | LOC_Os07g12650 | 2018 | 115.46  | 39.56  | 51.38   | -1.55 | 8.79E-106 | -1.17 | 4.60E-69  |
| <i>RPS12A</i>       | LOC_Os07g05580 | 417  | 657.83  | 290.02 | 291.60  | -1.18 | 1.19E-82  | -1.17 | 9.15E-82  |
| <i>RPS13A</i>       | LOC_Os08g02410 | 952  | 677.75  | 341.60 | 417.81  | -0.99 | 7.87E-145 | -0.70 | 3.96E-80  |
| <i>RPS13A</i>       | LOC_Os08g02400 | 869  | 142.08  | 115.51 | 88.38   | -0.30 | 3.71E-04  | -0.68 | 1.55E-15  |
| <i>RPS13B</i>       | LOC_Os07g38540 | 910  | 51.24   | 44.30  | 38.68   | -0.21 | 1.60E-01  | -0.41 | 3.26E-03  |
| <i>RPS14B</i>       | LOC_Os02g06700 | 948  | 780.04  | 329.77 | 494.84  | -1.24 | 1.04E-239 | -0.66 | 2.04E-82  |
| <i>RPS14A</i>       | LOC_Os02g33140 | 980  | 366.44  | 161.94 | 167.02  | -1.18 | 1.74E-107 | -1.13 | 5.09E-101 |
| <i>RPS15D</i>       | LOC_Os03g58430 | 528  | 338.81  | 211.24 | 265.45  | -0.68 | 8.66E-22  | -0.35 | 2.30E-07  |
| <i>RPS15Aa</i>      | LOC_Os07g10720 | 789  | 976.14  | 408.34 | 563.34  | -1.26 | 1.94E-254 | -0.79 | 4.54E-119 |
| <i>RPS15Ae</i>      | LOC_Os02g15610 | 868  | 19.50   | 17.44  | 30.05   | -0.16 | 5.72E-01  | 0.62  | 1.10E-03  |
| <i>RPS16A</i>       | LOC_Os11g03400 | 900  | 406.02  | 166.95 | 260.26  | -1.28 | 7.16E-125 | -0.64 | 1.45E-39  |
| <i>RPS16A</i>       | LOC_Os12g03090 | 1002 | 226.90  | 143.75 | 229.78  | -0.66 | 6.34E-26  | 0.02  | 7.76E-01  |
| <i>RPS17A</i>       | LOC_Os10g27190 | 870  | 322.36  | 165.01 | 176.18  | -0.97 | 5.11E-61  | -0.87 | 1.71E-51  |
| <i>RPS17D</i>       | LOC_Os03g01900 | 721  | 38.67   | 43.54  | 73.23   | 0.17  | 3.81E-01  | 0.92  | 2.04E-11  |

|                     |                |      |        |        |        |       |           |       |           |
|---------------------|----------------|------|--------|--------|--------|-------|-----------|-------|-----------|
| <i>RPS18A</i>       | LOC_Os03g58050 | 1017 | 712.10 | 364.74 | 532.22 | -0.97 | 3.34E-156 | -0.42 | 2.35E-36  |
| <i>RPS19C</i>       | LOC_Os03g31090 | 441  | 260.78 | 114.17 | 132.06 | -1.19 | 1.74E-35  | -0.98 | 3.25E-26  |
| <i>RPS20A</i>       | LOC_Os03g14530 | 753  | 171.68 | 68.98  | 65.66  | -1.32 | 2.19E-46  | -1.39 | 2.54E-50  |
| <i>RPS20C</i>       | LOC_Os10g08930 | 814  | 518.85 | 256.43 | 346.33 | -1.02 | 1.40E-99  | -0.58 | 1.43E-38  |
| <i>RPS20B</i>       | LOC_Os06g04290 | 774  | 261.58 | 128.66 | 186.25 | -1.02 | 1.30E-48  | -0.49 | 4.86E-14  |
| <i>RPS21C</i>       | LOC_Os03g22460 | 886  | 706.32 | 243.86 | 281.89 | -1.53 | 6.93E-280 | -1.33 | 4.38E-224 |
| <i>RPS23B</i>       | LOC_Os03g60400 | 429  | 368.65 | 169.36 | 233.47 | -1.12 | 3.61E-44  | -0.66 | 2.00E-18  |
| <i>RPS24B</i>       | LOC_Os02g13530 | 930  | 192.89 | 168.07 | 274.58 | -0.20 | 4.37E-03  | 0.51  | 1.23E-11  |
| <i>11681.m03559</i> | LOC_Os09g39540 | 716  | 140.69 | 125.29 | 111.73 | -0.17 | 8.87E-02  | -0.33 | 2.80E-04  |
| <i>RPS26B</i>       | LOC_Os01g60790 | 855  | 301.23 | 185.05 | 149.52 | -0.70 | 8.69E-33  | -1.01 | 1.95E-60  |
| <i>RPS26A</i>       | LOC_Os05g39960 | 959  | 644.25 | 304.88 | 321.33 | -1.08 | 3.35E-160 | -1.00 | 4.60E-142 |
| <i>11670.m02628</i> | LOC_Os04g27860 | 261  | 211.73 | 119.04 | 186.36 | -0.83 | 4.64E-10  | -0.18 | 1.58E-01  |
| <i>RPS27A</i>       | LOC_Os04g32710 | 138  | 109.43 | 56.58  | 127.53 | -0.95 | 4.12E-04  | 0.22  | 3.62E-01  |
| <i>RPS27Ab</i>      | LOC_Os01g22490 | 895  | 797.30 | 478.90 | 555.79 | -0.74 | 5.48E-97  | -0.52 | 9.89E-53  |
| <i>RPS27Ac</i>      | LOC_Os05g06770 | 859  | 443.56 | 383.78 | 508.12 | -0.21 | 6.50E-06  | 0.20  | 4.22E-06  |
| <i>RPS28A</i>       | LOC_Os03g07100 | 958  | 58.38  | 19.96  | 10.69  | -1.55 | 6.30E-26  | -2.45 | 2.75E-47  |
| <i>RPS29A</i>       | LOC_Os11g41610 | 171  | 278.52 | 104.36 | 124.44 | -1.42 | 1.75E-19  | -1.16 | 1.15E-14  |
| <i>RPS30B</i>       | LOC_Os06g07580 | 583  | 662.66 | 295.99 | 368.84 | -1.16 | 3.48E-113 | -0.85 | 4.86E-67  |

**Supplementary Table S4.** Significant pathways in L1 plants detected by KEGG analysis.

| #  | Significant Pathways                                  | DEGs with pathway annotation (3729) | All genes with pathway annotation (18735) | P value  | Q value  | Pathway ID |
|----|-------------------------------------------------------|-------------------------------------|-------------------------------------------|----------|----------|------------|
| 1  | Phosphatidylinositol signaling system                 | 58 (1.56%)                          | 132 (0.7%)                                | 2.82E-10 | 2.44E-08 | ko04070    |
| 2  | Endocytosis                                           | 65 (1.74%)                          | 174 (0.93%)                               | 6.52E-08 | 4.24E-06 | ko04144    |
| 3  | Cell cycle                                            | 86 (2.31%)                          | 261 (1.39%)                               | 4.11E-07 | 1.19E-05 | ko04110    |
| 4  | Aminoacyl-tRNA biosynthesis                           | 39 (1.05%)                          | 92 (0.49%)                                | 6.96E-07 | 1.81E-05 | ko00970    |
| 5  | Oocyte meiosis                                        | 83 (2.23%)                          | 260 (1.39%)                               | 2.72E-06 | 5.94E-05 | ko04114    |
| 6  | Regulation of actin cytoskeleton                      | 50 (1.34%)                          | 135 (0.72%)                               | 2.74E-06 | 5.94E-05 | ko04810    |
| 7  | Inositol phosphate metabolism                         | 38 (1.02%)                          | 97 (0.52%)                                | 9.31E-06 | 1.61E-04 | ko00562    |
| 8  | Long-term potentiation                                | 45 (1.21%)                          | 125 (0.67%)                               | 1.96E-05 | 2.83E-04 | ko04720    |
| 9  | Progesterone-mediated oocyte maturation               | 45 (1.21%)                          | 127 (0.68%)                               | 3.09E-05 | 4.02E-04 | ko04914    |
| 10 | Focal adhesion                                        | 35 (0.94%)                          | 95 (0.51%)                                | 9.21E-05 | 1.04E-03 | ko04510    |
| 11 | Non-homologous end-joining                            | 10 (0.27%)                          | 15 (0.08%)                                | 1.08E-04 | 1.17E-03 | ko03450    |
| 12 | Bacterial secretion system                            | 10 (0.27%)                          | 16 (0.09%)                                | 2.36E-04 | 2.45E-03 | ko03070    |
| 13 | Tight junction                                        | 32 (0.86%)                          | 89 (0.48%)                                | 3.02E-04 | 2.80E-03 | ko04530    |
| 14 | Nicotinate and nicotinamide metabolism                | 12 (0.32%)                          | 22 (0.12%)                                | 3.30E-04 | 2.86E-03 | ko00760    |
| 15 | MAPK signaling pathway                                | 50 (1.34%)                          | 160 (0.85%)                               | 4.25E-04 | 3.57E-03 | ko04010    |
| 16 | Regulation of autophagy                               | 33 (0.88%)                          | 96 (0.51%)                                | 6.24E-04 | 5.07E-03 | ko04140    |
| 17 | Nucleotide excision repair                            | 54 (1.45%)                          | 181 (0.97%)                               | 8.90E-04 | 6.80E-03 | ko03420    |
| 18 | Ribosome                                              | 112 (3%)                            | 436 (2.33%)                               | 1.76E-03 | 1.14E-02 | ko03010    |
| 19 | Peroxisome                                            | 47 (1.26%)                          | 159 (0.85%)                               | 2.26E-03 | 1.44E-02 | ko04146    |
| 20 | Glycosylphosphatidylinositol(GPI)-anchor biosynthesis | 11 (0.29%)                          | 23 (0.12%)                                | 2.39E-03 | 1.44E-02 | ko00563    |
| 21 | Phototransduction                                     | 17 (0.46%)                          | 43 (0.23%)                                | 2.39E-03 | 1.44E-02 | ko04744    |
| 22 | Photosynthesis - antenna proteins                     | 9 (0.24%)                           | 17 (0.09%)                                | 2.48E-03 | 1.47E-02 | ko00196    |
| 23 | Chemokine signaling pathway                           | 25 (0.67%)                          | 73 (0.39%)                                | 2.86E-03 | 1.64E-02 | ko04062    |
| 24 | Amino sugar and nucleotide sugar metabolism           | 63 (1.69%)                          | 228 (1.22%)                               | 2.90E-03 | 1.64E-02 | ko00520    |
| 25 | ErbB signaling pathway                                | 20 (0.54%)                          | 56 (0.3%)                                 | 4.22E-03 | 2.19E-02 | ko04012    |
| 26 | mTOR signaling pathway                                | 31 (0.83%)                          | 99 (0.53%)                                | 4.68E-03 | 2.30E-02 | ko04150    |
| 27 | Circadian rhythm - plant                              | 54 (1.45%)                          | 194 (1.04%)                               | 4.69E-03 | 2.30E-02 | ko04712    |
| 28 | ABC transporters                                      | 37 (0.99%)                          | 124 (0.66%)                               | 5.28E-03 | 2.54E-02 | ko02010    |
| 29 | Jak-STAT signaling pathway                            | 9 (0.24%)                           | 19 (0.1%)                                 | 6.41E-03 | 3.03E-02 | ko04630    |
| 30 | Dorso-ventral axis formation                          | 15 (0.4%)                           | 40 (0.21%)                                | 7.50E-03 | 3.42E-02 | ko04320    |
| 31 | Calcium signaling pathway                             | 48 (1.29%)                          | 173 (0.92%)                               | 7.83E-03 | 3.49E-02 | ko04020    |
| 32 | Purine metabolism                                     | 61 (1.64%)                          | 229 (1.22%)                               | 7.92E-03 | 3.49E-02 | ko00230    |
| 33 | Gap junction                                          | 23 (0.62%)                          | 73 (0.39%)                                | 1.26E-02 | 4.91E-02 | ko04540    |
| 34 | Adherens junction                                     | 23 (0.62%)                          | 73 (0.39%)                                | 1.26E-02 | 4.91E-02 | ko04520    |
| 35 | Protein processing in endoplasmic reticulum           | 112 (3%)                            | 463 (2.47%)                               | 1.26E-02 | 4.91E-02 | ko04141    |

\* We use "FDR  $\leq$  0.001 and the absolute value of  $\log_2\text{Ratio} \geq 1$ " as the threshold to judge the significance of gene expression difference

**Supplementary Table S5.** Significant pathways in L2 plants detected by KEGG analysis.

| #  | Significant Pathways                      | DEGs with pathway annotation (6131) | All genes with pathway annotation (18735) | P value  | Q value  | Pathway ID |
|----|-------------------------------------------|-------------------------------------|-------------------------------------------|----------|----------|------------|
| 1  | Aminoacyl-tRNA biosynthesis               | 55 (0.9%)                           | 92 (0.49%)                                | 8.57E-08 | 7.80E-06 | ko00970    |
| 2  | Regulation of actin cytoskeleton          | 73 (1.19%)                          | 135 (0.72%)                               | 2.36E-07 | 1.61E-05 | ko04810    |
| 3  | Lysine degradation                        | 31 (0.51%)                          | 49 (0.26%)                                | 1.12E-05 | 5.08E-04 | ko00310    |
| 4  | Non-homologous end-joining                | 13 (0.21%)                          | 15 (0.08%)                                | 2.50E-05 | 8.52E-04 | ko03450    |
| 5  | Photosynthesis - antenna proteins         | 14 (0.23%)                          | 17 (0.09%)                                | 3.66E-05 | 1.11E-03 | ko00196    |
| 6  | Focal adhesion                            | 50 (0.82%)                          | 95 (0.51%)                                | 4.64E-05 | 1.27E-03 | ko04510    |
| 7  | Phosphatidylinositol signaling system     | 65 (1.06%)                          | 132 (0.7%)                                | 5.80E-05 | 1.44E-03 | ko04070    |
| 8  | Purine metabolism                         | 103 (1.68%)                         | 229 (1.22%)                               | 6.75E-05 | 1.44E-03 | ko00230    |
| 9  | Cell cycle                                | 115 (1.88%)                         | 261 (1.39%)                               | 7.77E-05 | 1.52E-03 | ko04110    |
| 10 | Fatty acid metabolism                     | 38 (0.62%)                          | 69 (0.37%)                                | 1.05E-04 | 1.68E-03 | ko00071    |
| 11 | Nicotinate and nicotinamide metabolism    | 16 (0.26%)                          | 22 (0.12%)                                | 1.42E-04 | 2.02E-03 | ko00760    |
| 12 | Adherens junction                         | 39 (0.64%)                          | 73 (0.39%)                                | 2.03E-04 | 2.64E-03 | ko04520    |
| 13 | Peroxisome                                | 73 (1.19%)                          | 159 (0.85%)                               | 3.46E-04 | 4.10E-03 | ko04146    |
| 14 | Tight junction                            | 45 (0.73%)                          | 89 (0.48%)                                | 3.60E-04 | 4.10E-03 | ko04530    |
| 15 | Oocyte meiosis                            | 110 (1.79%)                         | 260 (1.39%)                               | 7.08E-04 | 7.16E-03 | ko04114    |
| 16 | Pyruvate metabolism                       | 48 (0.78%)                          | 101 (0.54%)                               | 1.37E-03 | 1.16E-02 | ko00620    |
| 17 | Endocytosis                               | 75 (1.22%)                          | 174 (0.93%)                               | 2.58E-03 | 1.95E-02 | ko04144    |
| 18 | Nucleotide excision repair                | 77 (1.26%)                          | 181 (0.97%)                               | 3.46E-03 | 2.46E-02 | ko03420    |
| 19 | ABC transporters                          | 55 (0.9%)                           | 124 (0.66%)                               | 4.39E-03 | 2.94E-02 | ko02010    |
| 20 | Glyoxylate and dicarboxylate metabolism   | 29 (0.47%)                          | 58 (0.31%)                                | 4.68E-03 | 2.99E-02 | ko00630    |
| 21 | Progesterone-mediated oocyte maturation   | 56 (0.91%)                          | 127 (0.68%)                               | 4.74E-03 | 2.99E-02 | ko04914    |
| 22 | Gap junction                              | 35 (0.57%)                          | 73 (0.39%)                                | 4.82E-03 | 2.99E-02 | ko04540    |
| 23 | Pathogenic Escherichia coli infection     | 43 (0.7%)                           | 94 (0.5%)                                 | 5.67E-03 | 3.37E-02 | ko05130    |
| 24 | Chloroalkane and chloroalkene degradation | 19 (0.31%)                          | 35 (0.19%)                                | 6.81E-03 | 3.72E-02 | ko00625    |
| 25 | Other glycan degradation                  | 20 (0.33%)                          | 38 (0.2%)                                 | 8.69E-03 | 4.50E-02 | ko00511    |
| 26 | Regulation of autophagy                   | 43 (0.7%)                           | 96 (0.51%)                                | 8.89E-03 | 4.50E-02 | ko04140    |
| 27 | Glutathione metabolism                    | 63 (1.03%)                          | 149 (0.8%)                                | 8.91E-03 | 4.50E-02 | ko00480    |
| 28 | Propanoate metabolism                     | 24 (0.39%)                          | 48 (0.26%)                                | 9.63E-03 | 4.75E-02 | ko00640    |
| 29 | Ascorbate and aldarate metabolism         | 47 (0.77%)                          | 107 (0.57%)                               | 9.91E-03 | 4.75E-02 | ko00053    |

\* We use "FDR  $\leq$  0.001 and the absolute value of  $\log_2\text{Ratio} \geq 1$ " as the threshold to judge the significance of gene expression difference
